# Supplementary material
Source: ML conference proceedings conference paper supplement (https://openaccess.thecvf.com/content/WACV2023/html/Yin_Dance_Style_Transfer_WACV_2023_paper.html)
Supplement: Supplementary file 1 [file Yin_Dance_Style_Transfer_WACV_2023_supplemental.pdf]

# Participant Information Sheet

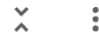

Form description

## Description of the research

Dance style transfer has found various applications in video games, choreography, and interactive media. We develop a new end-to-end dance style transfer framework.

## An invitation to participate in our research

We would like to invite you to participate within our research project by watching videos and answering questions in this questionnaire. In total, there are 10 sections, 18 videos.

This research requires about 15 minutes of your time and we would really appreciate your help.

You are free to opt-out and leave at any point during the study. In addition, you may also request the deletion of your data up to seven days after the study was conducted by sending an E-Mail to the responsible researcher XXX [xxx@xxx.xxx]. To ensure you can withdraw from your participation afterwards, your responses to the questionnaire will be linked to your name via a unique id. The mapping of the id and your personal information is only known to authorized personnel, will be securely stored and not shared with anyone outside the research group conducting this study. If you decide to withdraw, your data will be removed from the study and will be destroyed.

## Contact details

If you have any further questions about this research or concerns regarding your participation then please contact XXX[xxx@xxx.xxx].

## Results of the research

The results of this research may be used for conference papers and peer-reviewed journal articles. It will also help us to further develop robots and virtual characters as part of the research project mentioned above.

## Statements of Understanding and Consent

In order to participate in the research experiment, you must give consent to the following statements. If you are uncomfortable with any of them, you may stop your participation without any disadvantage.

### Question \*

- I have read and understand the participant information for this research.
- I understand that my participation is voluntary and unpaid, and that I am free to withdraw at any time durin...
- Based upon the above, I agree to take part in this study.

## General Information

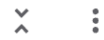

Description (optional)

What is your Email? (only used to retrieve your data in case of withdrawal request) \*

Short answer text

What is your gender ? \*

- Male
- Female
- Other
- Prefer not to say

What is your age? \*

Short answer text

## Additional Information

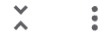

Description (optional)

How many (cumulative) years of dance experience do you have (this could include training, performing, choreographing, or teaching dance)? \*

- Less than 5 years
- 5 or more years

How familiar are you with ballet jazz as a dance form? \*

|            |                       |                       |                       |                       |                       |               |
|------------|-----------------------|-----------------------|-----------------------|-----------------------|-----------------------|---------------|
|            | 1                     | 2                     | 3                     | 4                     | 5                     |               |
| Not at all | <input type="radio"/> | Very familiar |

How familiar are you with locking as a dance form? \*

|            |                       |                       |                       |                       |                       |               |
|------------|-----------------------|-----------------------|-----------------------|-----------------------|-----------------------|---------------|
|            | 1                     | 2                     | 3                     | 4                     | 5                     |               |
| Not at all | <input type="radio"/> | Very familiar |

How often do you play video games? \*

- Rarely
- Yearly
- Monthly
- Weekly

## Example and Guidelines

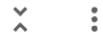

The purpose of this research is to automatically transfer a dance motion sequence from one style to another using artificial intelligence (AI) techniques. "Transfer" here means creating a dance motion sequence that is strongly inspired by the original sequence but in a different style.

In this section, your task is to watch the videos and answer the questions. In these videos (with music), an x-bot (red) performs jazz ballet dance, or a y-bot (blue) performs locking dance. (The order is shuffled)

For two question, you are asked to select an answer from 1-5 Likert Scale. 1 to 5 are mapped to following answers:

|                            |      |
|----------------------------|------|
| Strongly disagree          | -- 1 |
| Disagree                   | -- 2 |
| Neither agree nor disagree | -- 3 |
| Agree                      | -- 4 |
| Strongly agree             | -- 5 |

For another question, you are asked to select choices that you preferred.  
For each video, there is an optional comment.

You could replay videos and change answers.

\*Please make sure your sound is on.\*

To get started, here are some example videos for each style. Use these videos to get more familiar with each dance style, if you aren't already.

### Example Jazz Ballet Dance 1

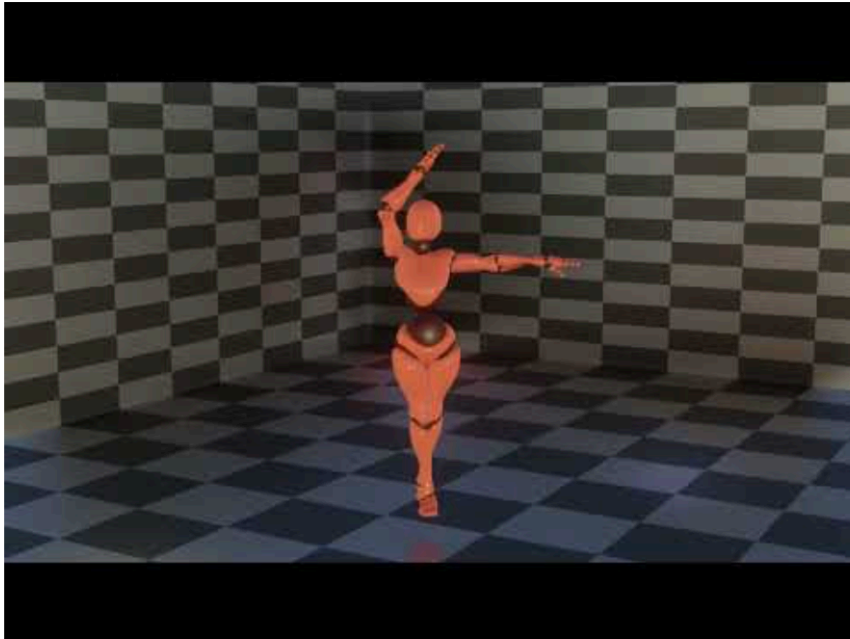

Example Jazz Ballet Dance 2

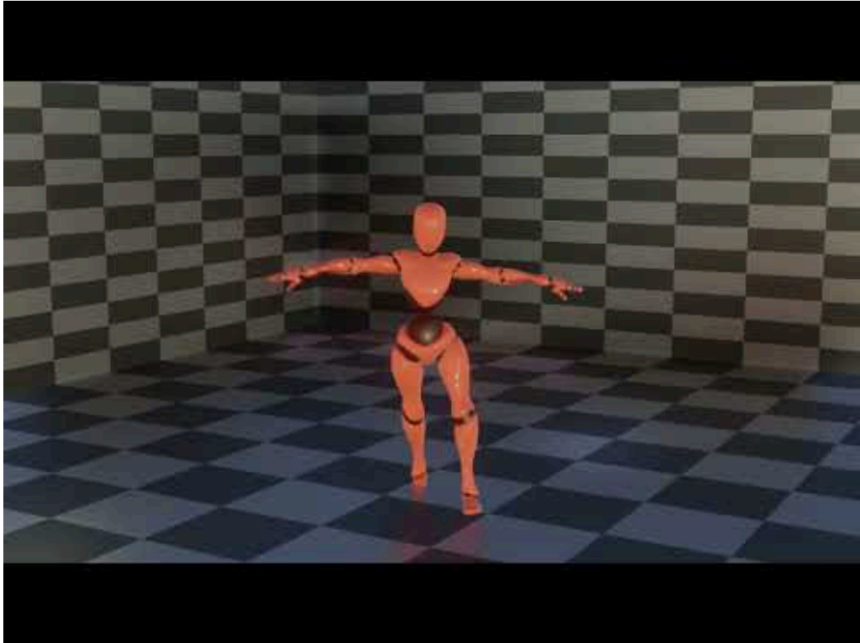

Example Jazz Ballet Dance 3

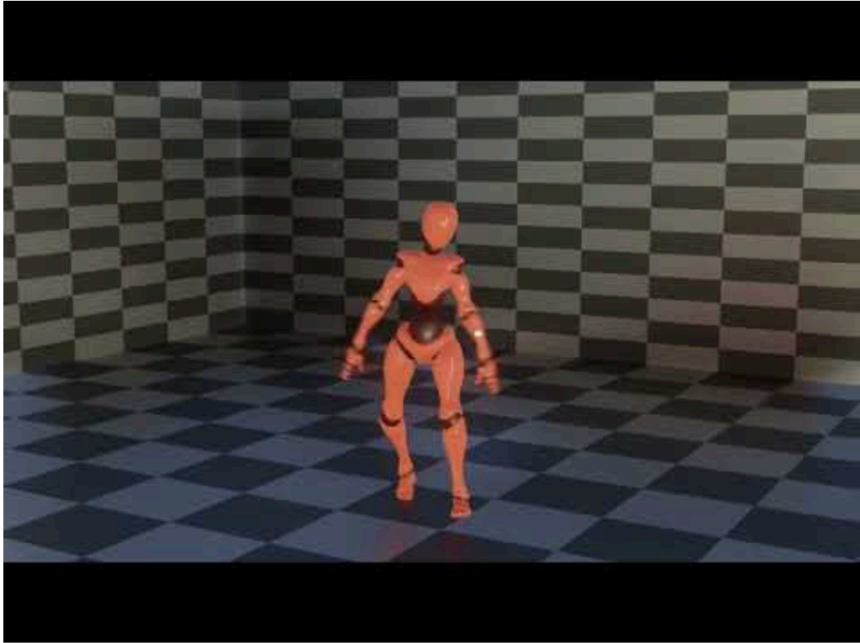

Example Locking Dance 1

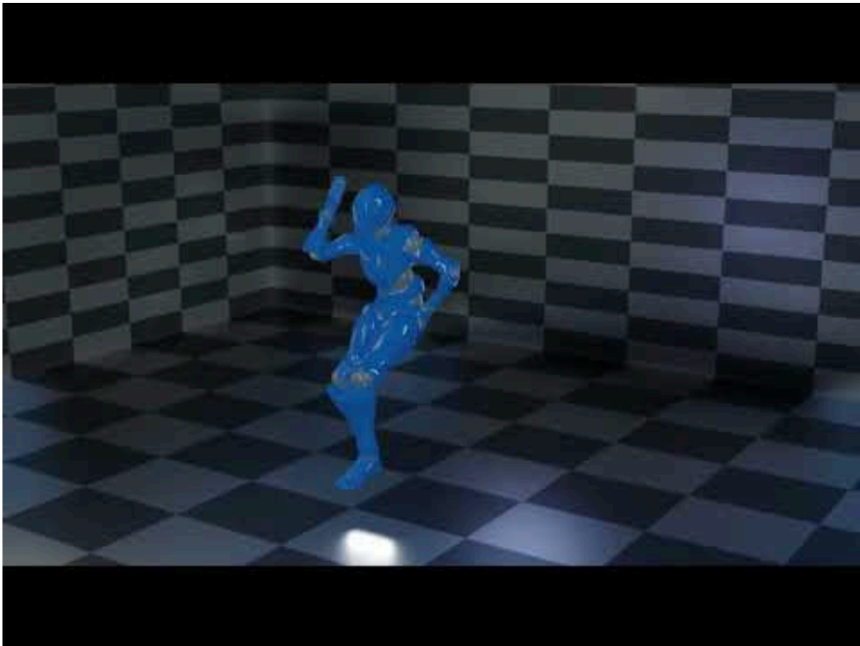

Example Locking Dance 2

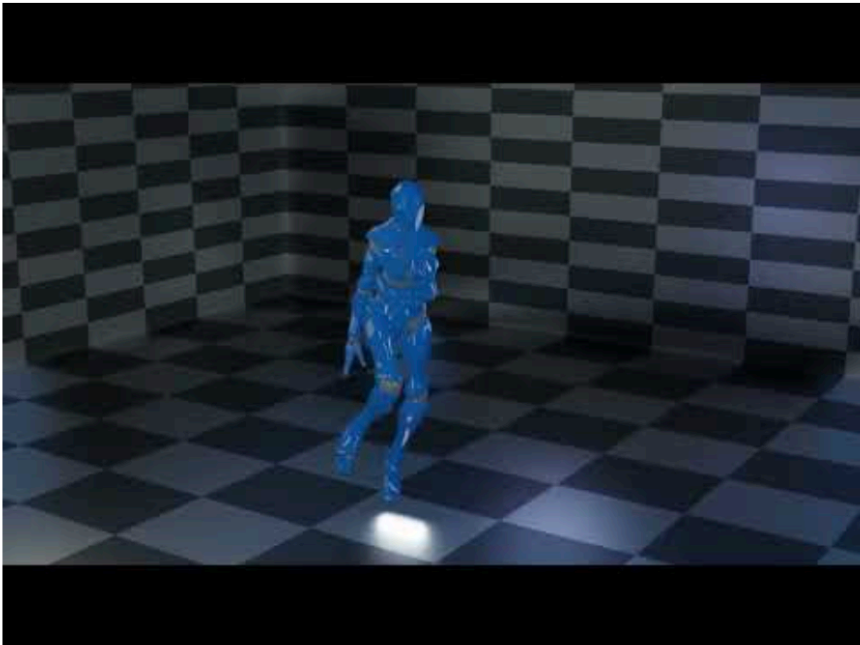

### Example Locking Dance 3

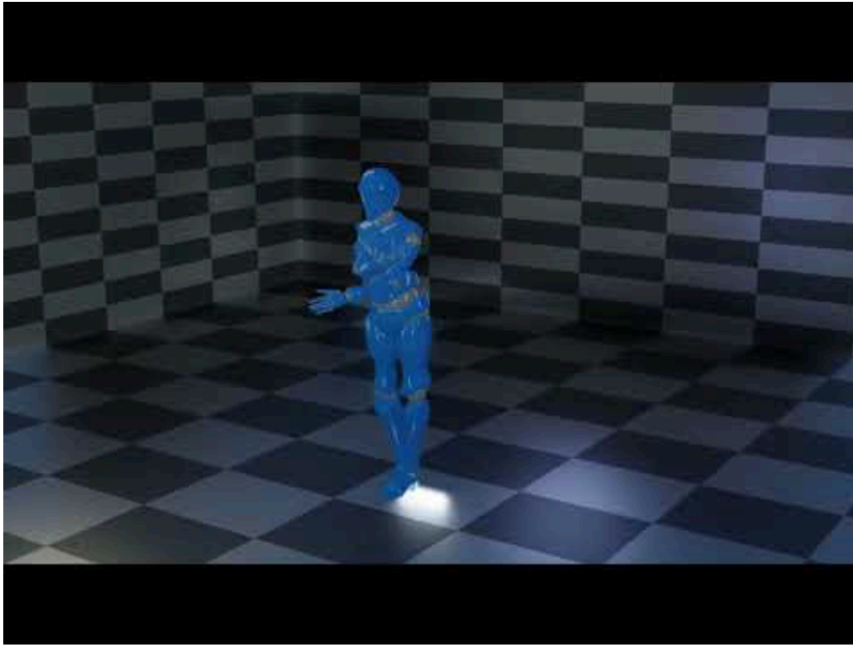

Above are example videos. Now on to the questions.

Description (optional)

# Section 1

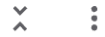

Transfer jazz ballet dance to locking dance.

You could watch these videos multiple times as the similarity might not be obvious at first glance. To replay a video, use the replay button at the bottom left of the video.

Description (optional)

original movement sequence

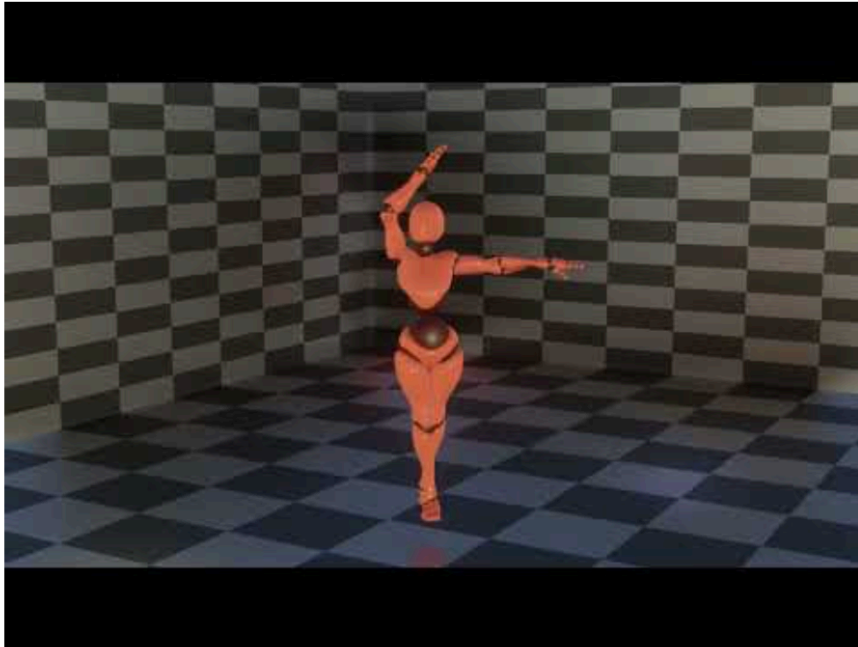



result 1

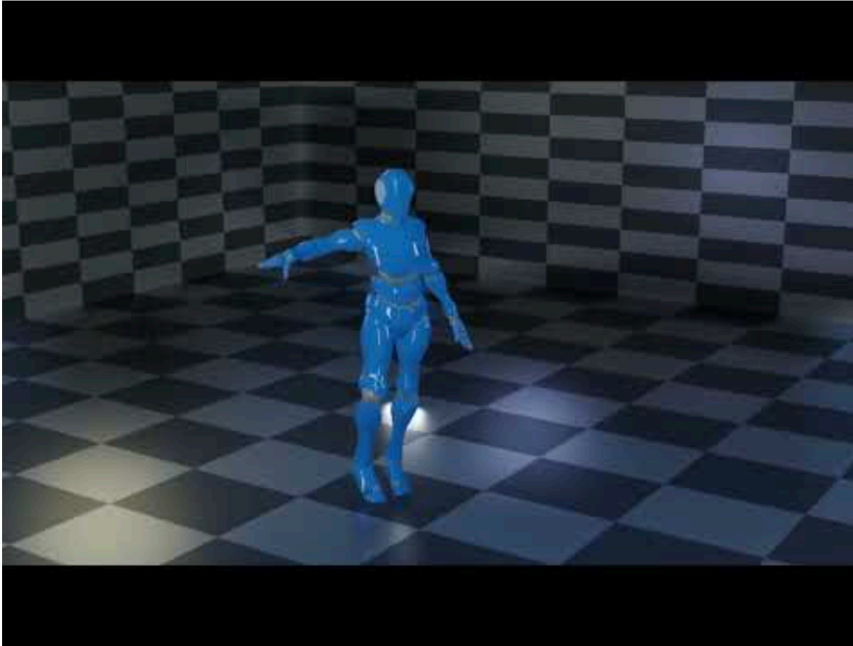

Q1 for result 1: To what extent do you agree with the following statements? \*

--- The generated motion looks like locking dance.

|                   |                       |                       |                       |                       |                       |                |
|-------------------|-----------------------|-----------------------|-----------------------|-----------------------|-----------------------|----------------|
|                   | 1                     | 2                     | 3                     | 4                     | 5                     |                |
| Strongly disagree | <input type="radio"/> | Strongly agree |

Q2 for result 1: To what extent do you agree with the following statements? \*

--- The generated motion looks natural.

|                   |                       |                       |                       |                       |                       |                |
|-------------------|-----------------------|-----------------------|-----------------------|-----------------------|-----------------------|----------------|
|                   | 1                     | 2                     | 3                     | 4                     | 5                     |                |
| Strongly disagree | <input type="radio"/> | Strongly agree |

Q3 for result 1 : Which feature(s) do you think is (are) the most preserved between the original <sup>\*</sup> and the result video?

- Orientation through space
- Shapes of the limbs
- Shape of the body trunk
- Rhythmic patterns
- Other...

Comment (optional)

Short answer text

---

original movement sequence

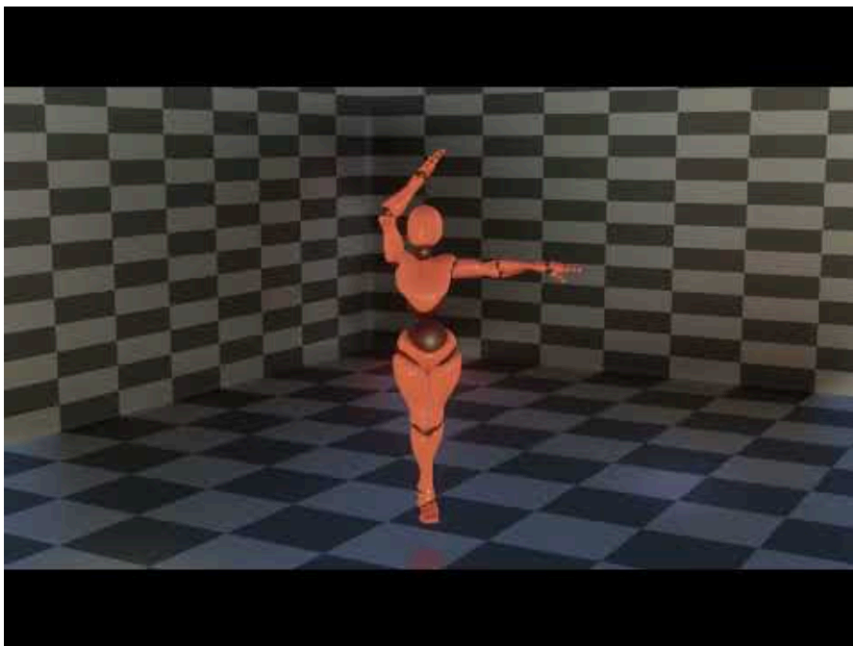

result 2

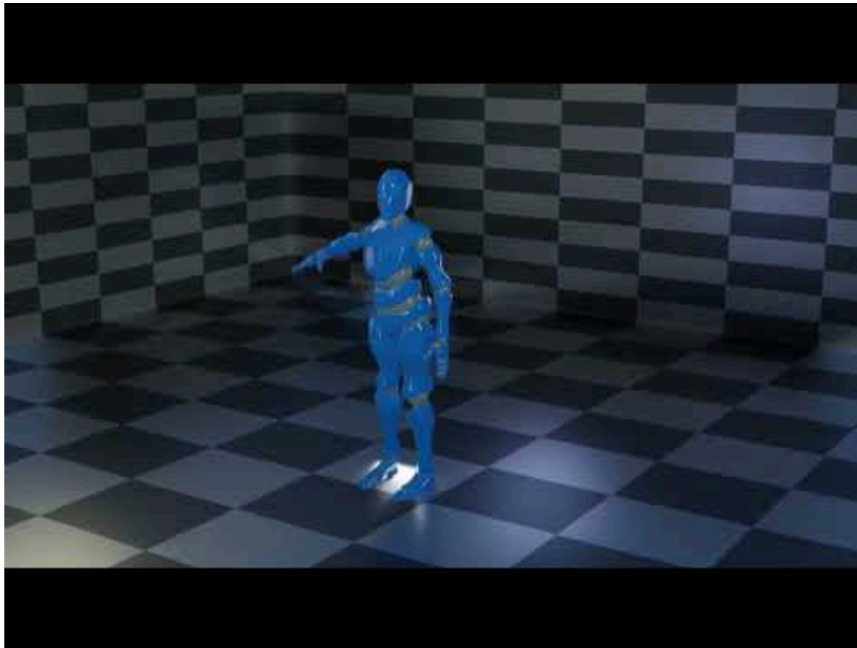

Q1 for result 2 : To what extent do you agree with the following statements? \*

--- The generated motion looks like locking dance.

|                   |                       |                       |                       |                       |                       |                |
|-------------------|-----------------------|-----------------------|-----------------------|-----------------------|-----------------------|----------------|
|                   | 1                     | 2                     | 3                     | 4                     | 5                     |                |
| Strongly disagree | <input type="radio"/> | Strongly agree |

Q2 for result 2 : To what extent do you agree with the following statements? \*

--- The generated motion looks natural.

|                   |                       |                       |                       |                       |                       |                |
|-------------------|-----------------------|-----------------------|-----------------------|-----------------------|-----------------------|----------------|
|                   | 1                     | 2                     | 3                     | 4                     | 5                     |                |
| Strongly disagree | <input type="radio"/> | Strongly agree |

Q3 for result 1 : Which feature(s) do you think is (are) the most preserved between the original <sup>\*</sup> and the result video?

- Orientation through space
- Shapes of the limbs
- Shape of the body trunk
- Rhythmic patterns
- Other...

Comment (optional)

Short answer text

After section 5 Continue to next section

Section 6 of 12

## Section 2

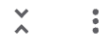

Transfer jazz ballet dance to locking dance.

You could watch these videos multiple times as the similarity might not be obvious at first glance. To replay a video, use the replay button at the bottom left of the video.

Description (optional)

original movement sequence

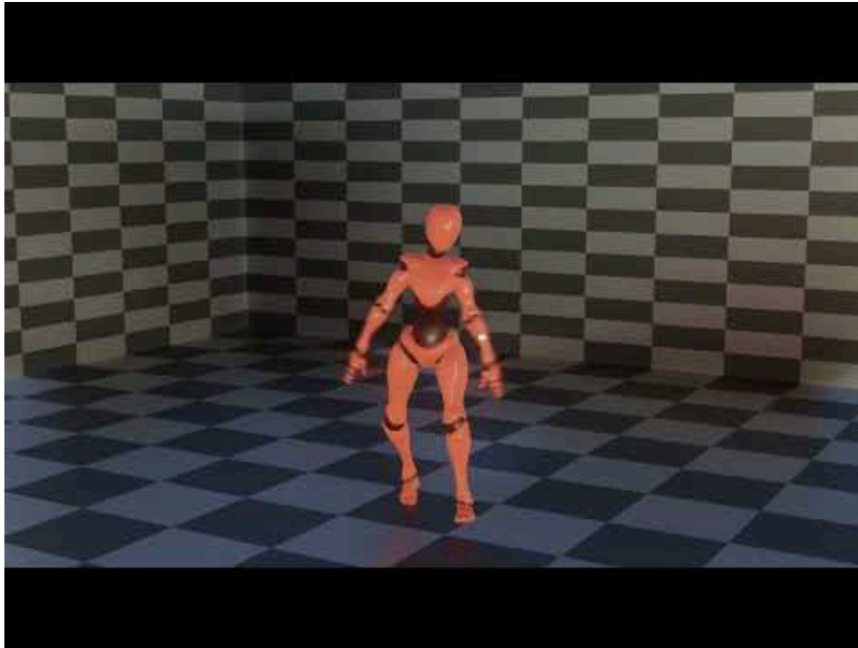

result 1

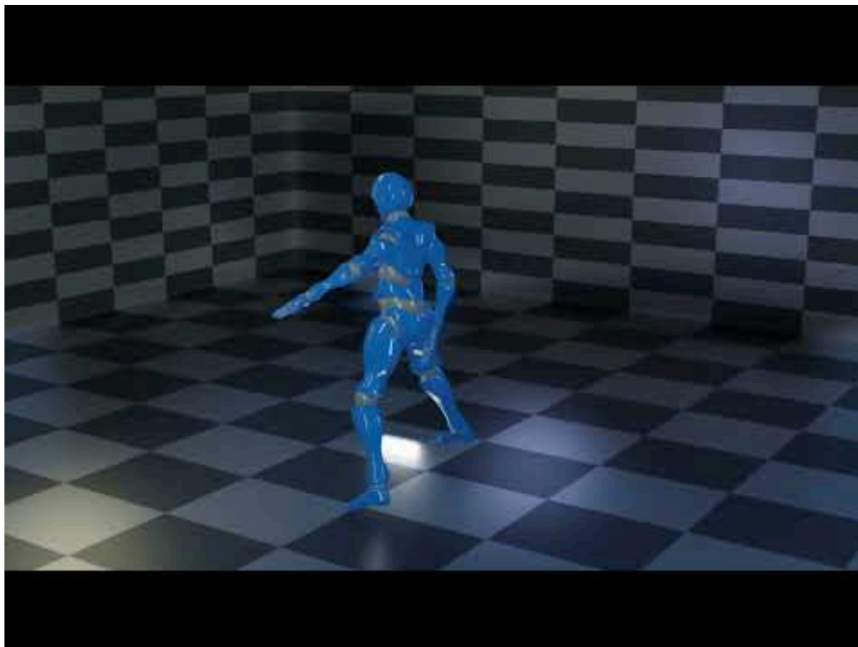

Q1 for result 1 : To what extent do you agree with the following statements? \*

--- The generated motion looks like locking dance.

|                   |                       |                       |                       |                       |                       |                |
|-------------------|-----------------------|-----------------------|-----------------------|-----------------------|-----------------------|----------------|
|                   | 1                     | 2                     | 3                     | 4                     | 5                     |                |
| Strongly disagree | <input type="radio"/> | Strongly agree |

Q2 for result 1 : To what extent do you agree with the following statements? \*

--- The generated motion looks natural.

|                   |                       |                       |                       |                       |                       |                |
|-------------------|-----------------------|-----------------------|-----------------------|-----------------------|-----------------------|----------------|
|                   | 1                     | 2                     | 3                     | 4                     | 5                     |                |
| Strongly disagree | <input type="radio"/> | Strongly agree |

Q3 for result 1 : Which feature(s) do you think is (are) the most preserved between the original and the result video? \*

- Orientation through space
- Shapes of the limbs
- Shape of the body trunk
- Rhythmic patterns
- Other...

Comment (optional)

Short answer text

---

original movement sequence

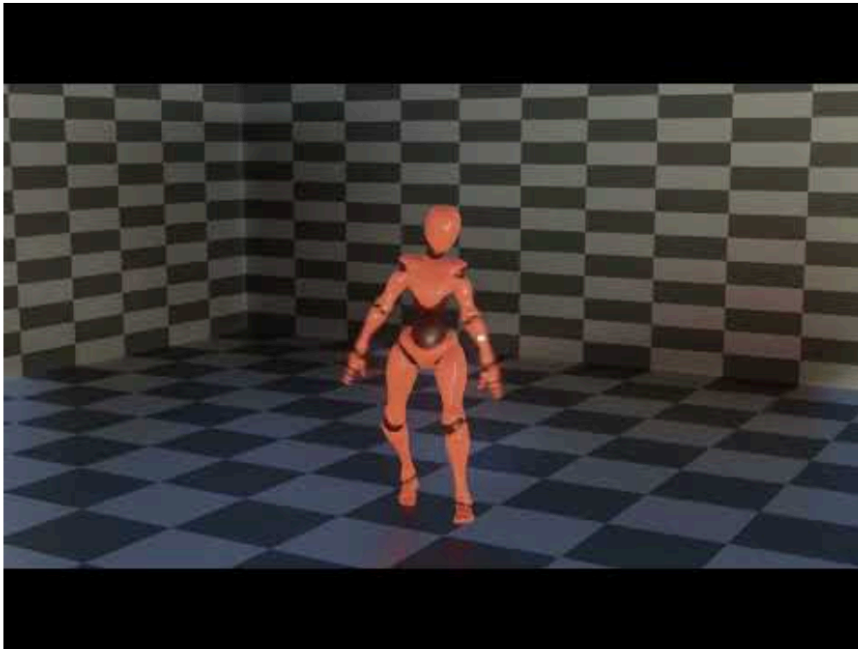

result 2

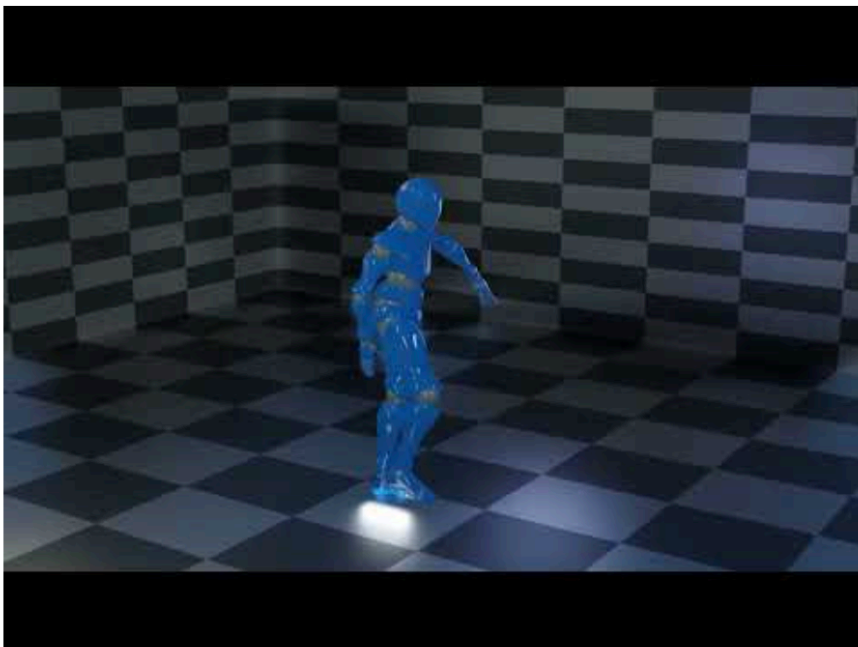

Q1 for result 2 : To what extent do you agree with the following statements? \*

--- The generated motion looks like locking dance.

|                   |                       |                       |                       |                       |                       |                |
|-------------------|-----------------------|-----------------------|-----------------------|-----------------------|-----------------------|----------------|
|                   | 1                     | 2                     | 3                     | 4                     | 5                     |                |
| Strongly disagree | <input type="radio"/> | Strongly agree |

Q2 for result 2 : To what extent do you agree with the following statements? \*

--- The generated motion looks natural.

|                   |                       |                       |                       |                       |                       |                |
|-------------------|-----------------------|-----------------------|-----------------------|-----------------------|-----------------------|----------------|
|                   | 1                     | 2                     | 3                     | 4                     | 5                     |                |
| Strongly disagree | <input type="radio"/> | Strongly agree |

Q3 for result 2 : Which feature(s) do you think is (are) the most preserved between the original and the result video? \*

- Orientation through space
- Shapes of the limbs
- Shape of the body trunk
- Rhythmic patterns
- Other...

Comment (optional)

Short answer text

---



## Section 3

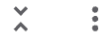

Transfer jazz ballet dance to locking dance.

You could watch these videos multiple times as the similarity might not be obvious at first glance. To replay a video, use the replay button at the bottom left of the video.

Description (optional)

original movement sequence

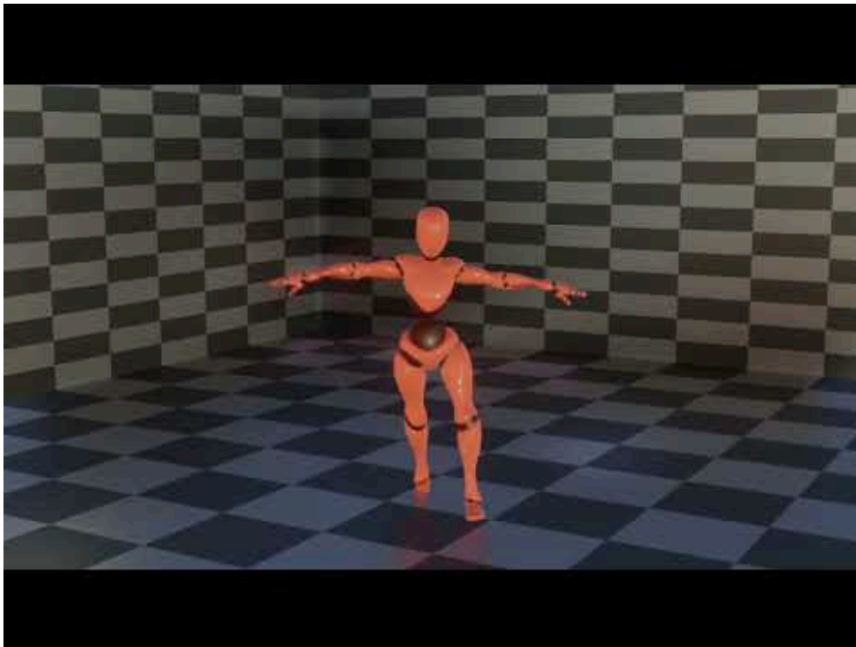

result 1

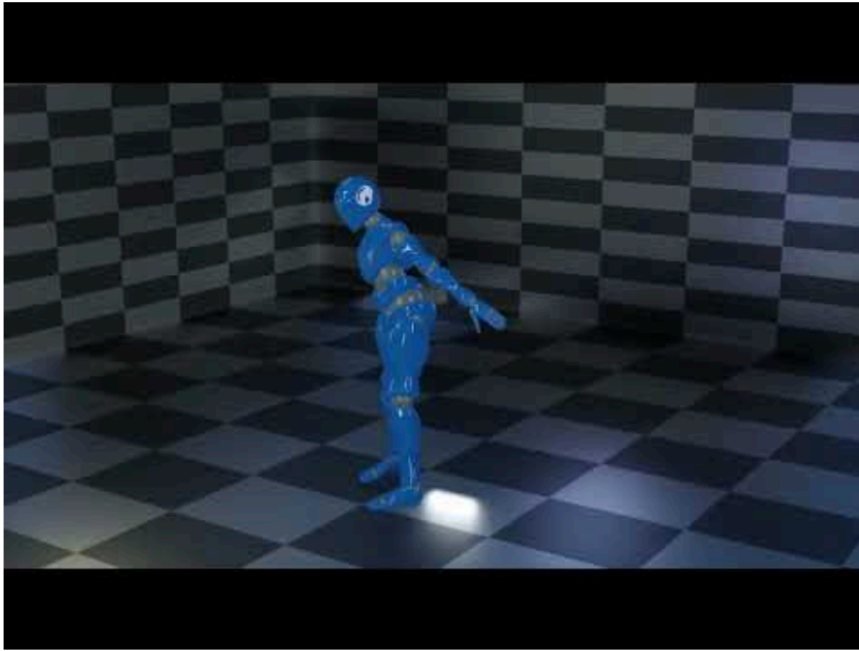

Q1 for result 1 : To what extent do you agree with the following statements? \*

--- The generated motion looks like locking dance.

|                   |                       |                       |                       |                       |                       |                |
|-------------------|-----------------------|-----------------------|-----------------------|-----------------------|-----------------------|----------------|
|                   | 1                     | 2                     | 3                     | 4                     | 5                     |                |
| Strongly disagree | <input type="radio"/> | Strongly agree |

Q2 for result 1 : To what extent do you agree with the following statements? \*

--- The generated motion looks natural.

|                   |                       |                       |                       |                       |                       |                |
|-------------------|-----------------------|-----------------------|-----------------------|-----------------------|-----------------------|----------------|
|                   | 1                     | 2                     | 3                     | 4                     | 5                     |                |
| Strongly disagree | <input type="radio"/> | Strongly agree |

Q3 for result 1 : Which feature(s) do you think is (are) the most preserved between the original \*  
and the result video?

- Orientation through space
- Shapes of the limbs
- Shape of the body trunk
- Rhythmic patterns
- Other...

Comment (optional)

Short answer text

---

original movement sequence

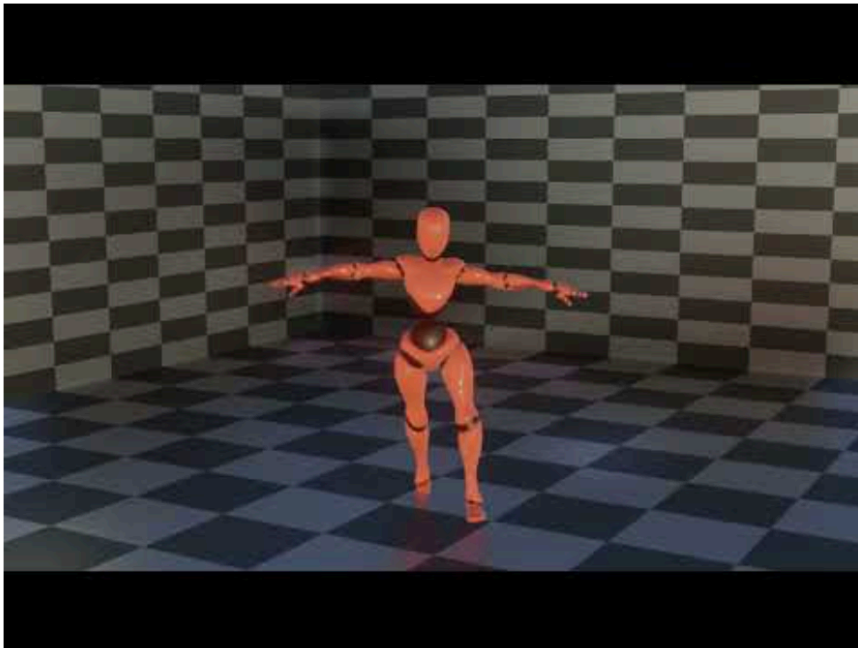

result 2

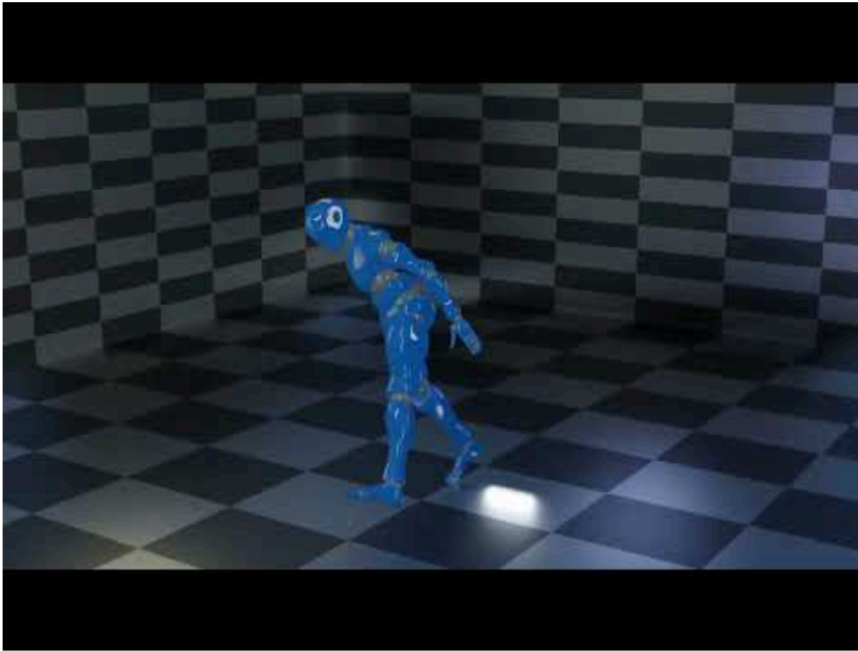

Q1 for result 2 : To what extent do you agree with the following statements? \*

--- The generated motion looks like locking dance.

|                   |                       |                       |                       |                       |                       |                |
|-------------------|-----------------------|-----------------------|-----------------------|-----------------------|-----------------------|----------------|
|                   | 1                     | 2                     | 3                     | 4                     | 5                     |                |
| Strongly disagree | <input type="radio"/> | Strongly agree |

Q2 for result 2 : To what extent do you agree with the following statements? \*

--- The generated motion looks natural.

|                   |                       |                       |                       |                       |                       |                |
|-------------------|-----------------------|-----------------------|-----------------------|-----------------------|-----------------------|----------------|
|                   | 1                     | 2                     | 3                     | 4                     | 5                     |                |
| Strongly disagree | <input type="radio"/> | Strongly agree |

Q3 for result 2 : Which feature(s) do you think is (are) the most preserved between the original <sup>\*</sup> and the result video?

- Orientation through space
- Shapes of the limbs
- Shape of the body trunk
- Rhythmic patterns
- Other...

Comment (optional)

Short answer text

---

After section 7 Continue to next section 

Section 8 of 12

## Section 4

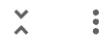

Transfer locking dance to jazz ballet dance.

You could watch these videos multiple times as the similarity might not be obvious at first glance. To replay a video, use the replay button at the bottom left of the video.

Description (optional)

original movement sequence

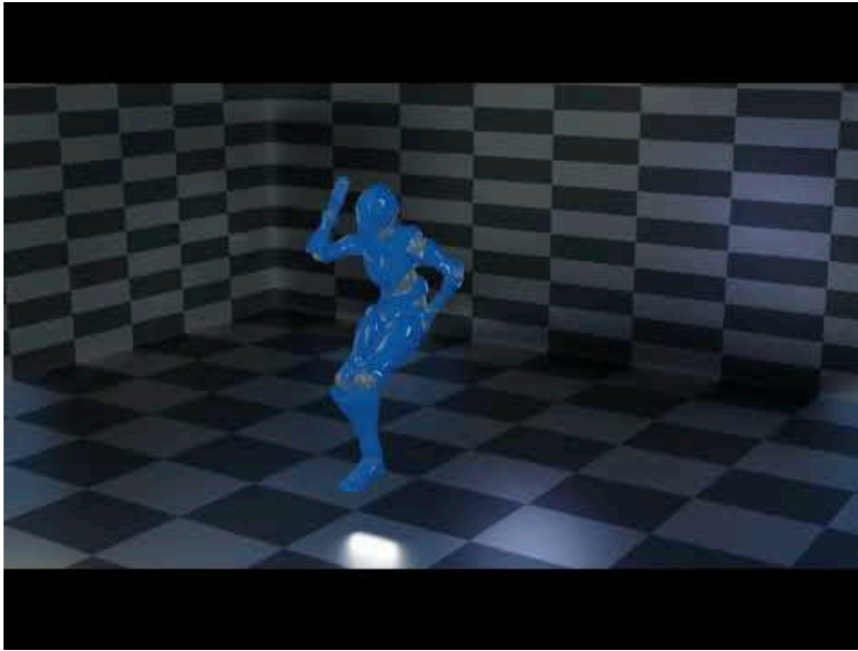

result 1

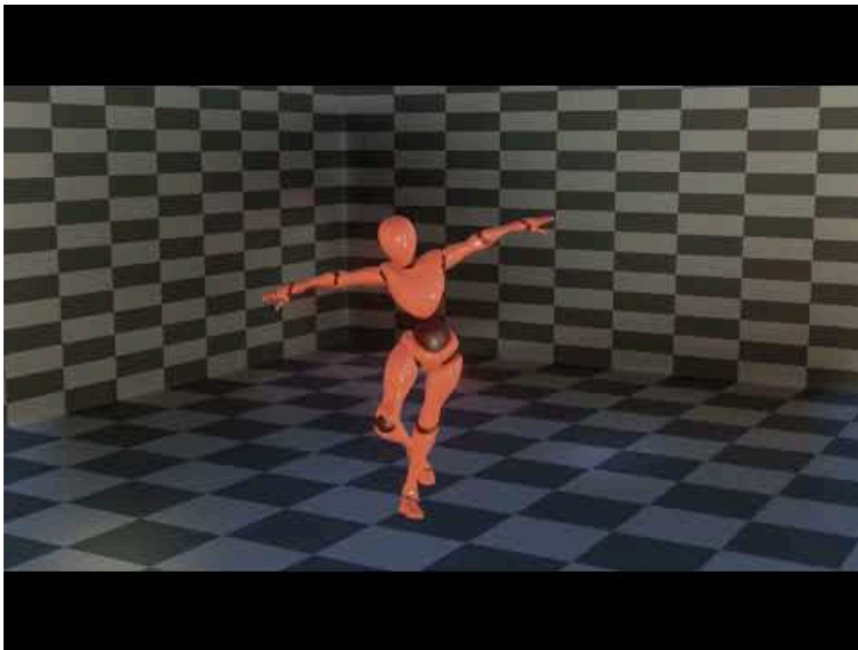

Q1 for result 1 : To what extent do you agree with the following statements? \*

--- The generated motion looks like ballet jazz dance.

|                   |                       |                       |                       |                       |                       |                |
|-------------------|-----------------------|-----------------------|-----------------------|-----------------------|-----------------------|----------------|
|                   | 1                     | 2                     | 3                     | 4                     | 5                     |                |
| Strongly disagree | <input type="radio"/> | Strongly agree |

Q2 for result 1 : To what extent do you agree with the following statements? \*

--- The generated motion looks natural.

|                   |                       |                       |                       |                       |                       |                |
|-------------------|-----------------------|-----------------------|-----------------------|-----------------------|-----------------------|----------------|
|                   | 1                     | 2                     | 3                     | 4                     | 5                     |                |
| Strongly disagree | <input type="radio"/> | Strongly agree |

Q3 for result 1 : Which feature(s) do you think is (are) the most preserved between the original and the result video? \*

- Orientation through space
- Shapes of the limbs
- Shape of the body trunk
- Rhythmic patterns
- Other...

Comment (optional)

Short answer text

---

original movement sequence

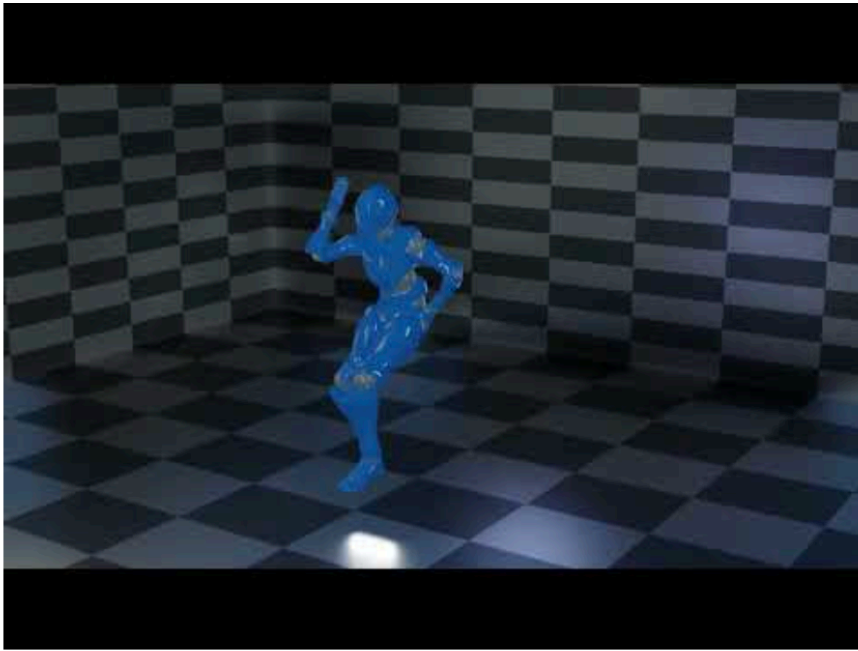

result 2

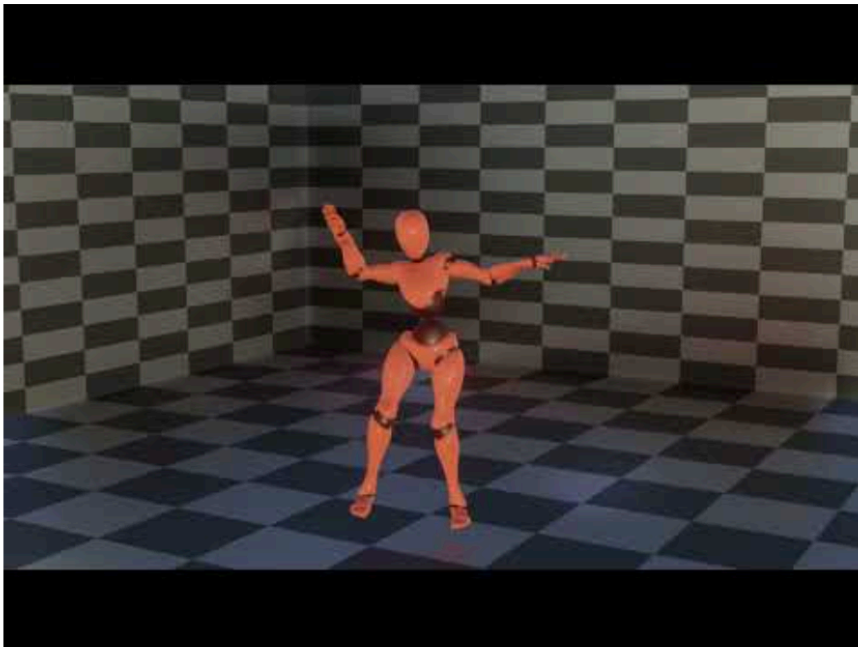



Q1 for result 2 : To what extent do you agree with the following statements? \*

--- The generated motion looks like ballet jazz dance.

|                   |                       |                       |                       |                       |                       |                |
|-------------------|-----------------------|-----------------------|-----------------------|-----------------------|-----------------------|----------------|
|                   | 1                     | 2                     | 3                     | 4                     | 5                     |                |
| Strongly disagree | <input type="radio"/> | Strongly agree |

Q2 for result 2 : To what extent do you agree with the following statements? \*

--- The generated motion looks natural.

|                   |                       |                       |                       |                       |                       |                |
|-------------------|-----------------------|-----------------------|-----------------------|-----------------------|-----------------------|----------------|
|                   | 1                     | 2                     | 3                     | 4                     | 5                     |                |
| Strongly disagree | <input type="radio"/> | Strongly agree |

Q3 for result 2 : Which feature(s) do you think is (are) the most preserved between the original and the result video? \*

- Orientation through space
- Shapes of the limbs
- Shape of the body trunk
- Rhythmic patterns
- Other...

Comment (optional)

Short answer text

---

## Section 5

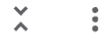

Transfer locking dance to jazz ballet dance.

You could watch these videos multiple times as the similarity might not be obvious at first glance. To replay a video, use the replay button at the bottom left of the video.

Description (optional)

original movement sequence

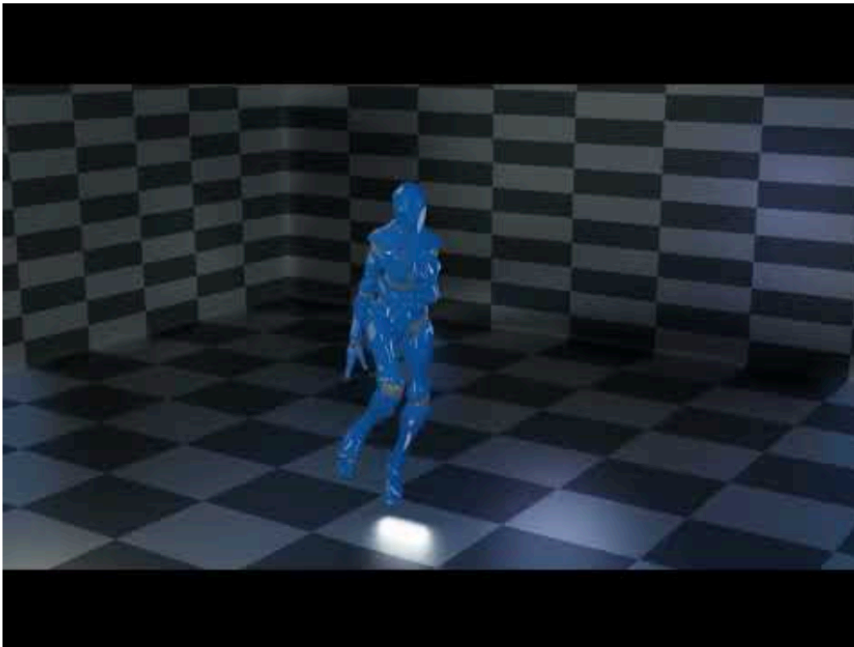

result 1

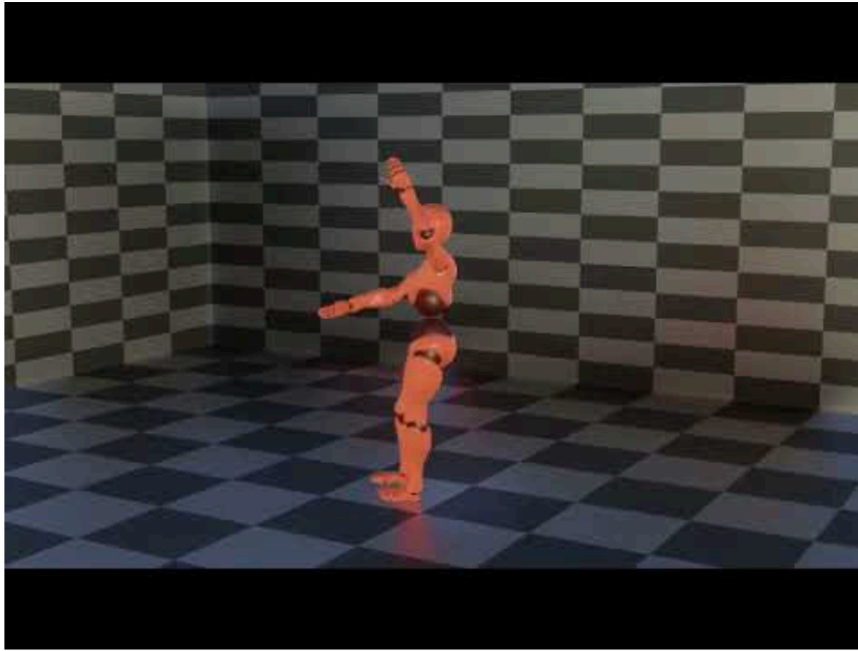

Q1 for result 1: To what extent do you agree with the following statements? \*

--- The generated motion looks like ballet jazz dance.

|                   |                       |                       |                       |                       |                       |                |
|-------------------|-----------------------|-----------------------|-----------------------|-----------------------|-----------------------|----------------|
|                   | 1                     | 2                     | 3                     | 4                     | 5                     |                |
| Strongly disagree | <input type="radio"/> | Strongly agree |

Q2 for result 1: To what extent do you agree with the following statements? \*

--- The generated motion looks natural.

|                   |                       |                       |                       |                       |                       |                |
|-------------------|-----------------------|-----------------------|-----------------------|-----------------------|-----------------------|----------------|
|                   | 1                     | 2                     | 3                     | 4                     | 5                     |                |
| Strongly disagree | <input type="radio"/> | Strongly agree |

Q3 for result 1 : Which feature(s) do you think is (are) the most preserved between the original <sup>\*</sup> and the result video?

- Orientation through space
- Shapes of the limbs
- Shape of the body trunk
- Rhythmic patterns
- Other...

Comment (optional)

Short answer text

---

original movement sequence

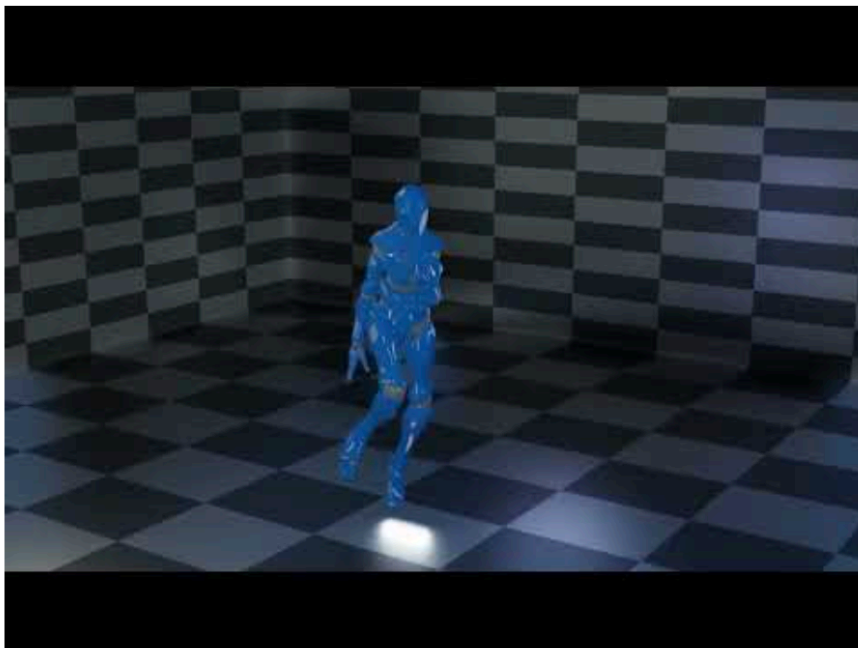

result 2

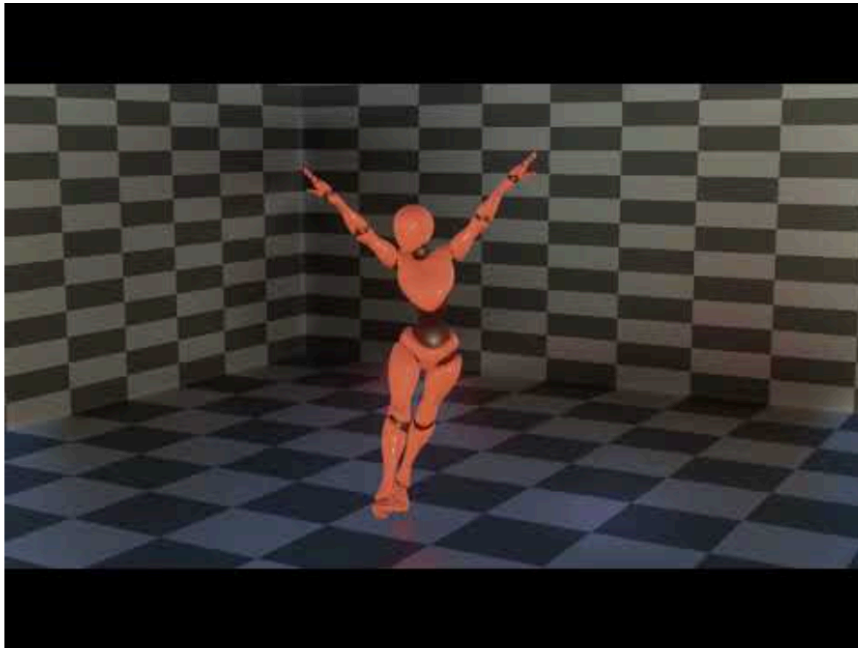

Q1 for result 2 : To what extent do you agree with the following statements? \*

--- The generated motion looks like ballet jazz dance.

|                   |                       |                       |                       |                       |                       |                |
|-------------------|-----------------------|-----------------------|-----------------------|-----------------------|-----------------------|----------------|
|                   | 1                     | 2                     | 3                     | 4                     | 5                     |                |
| Strongly disagree | <input type="radio"/> | Strongly agree |

Q2 for result 2 : To what extent do you agree with the following statements? \*

--- The generated motion looks natural.

|                   |                       |                       |                       |                       |                       |                |
|-------------------|-----------------------|-----------------------|-----------------------|-----------------------|-----------------------|----------------|
|                   | 1                     | 2                     | 3                     | 4                     | 5                     |                |
| Strongly disagree | <input type="radio"/> | Strongly agree |

Q3 for result 2 : Which feature(s) do you think is (are) the most preserved between the original <sup>\*</sup> and the result video?

Orientation through space

Shapes of the limbs

Shape of the body trunk

Rhythmic patterns

Other...

Comment (optional)

Short answer text

After section 9 Continue to next section

Section 10 of 12

## Section 6

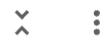

Transfer locking dance to jazz ballet dance.

You could watch these videos multiple times as the similarity might not be obvious at first glance. To replay a video, use the replay button at the bottom left of the video.

Description (optional)

original movement sequence

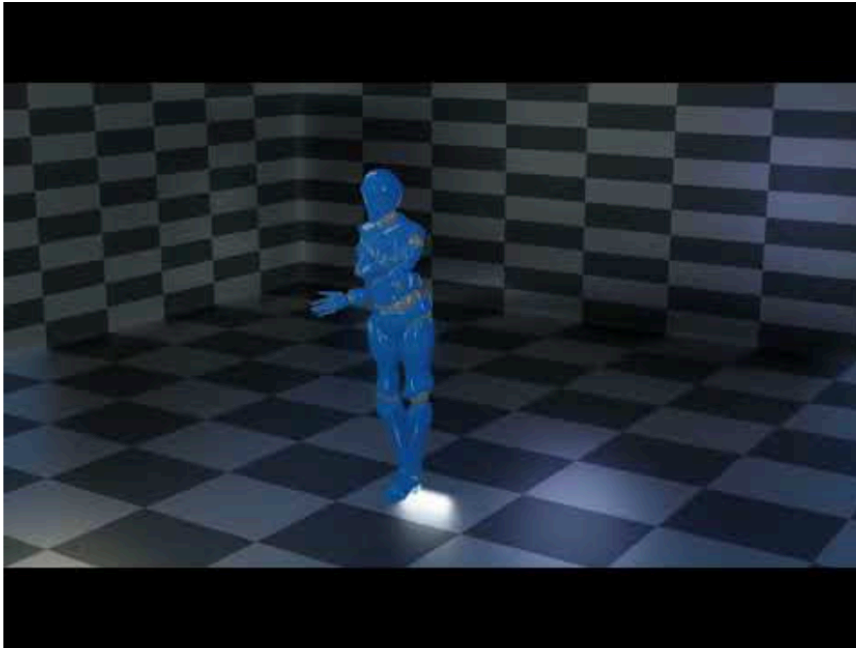

result 1

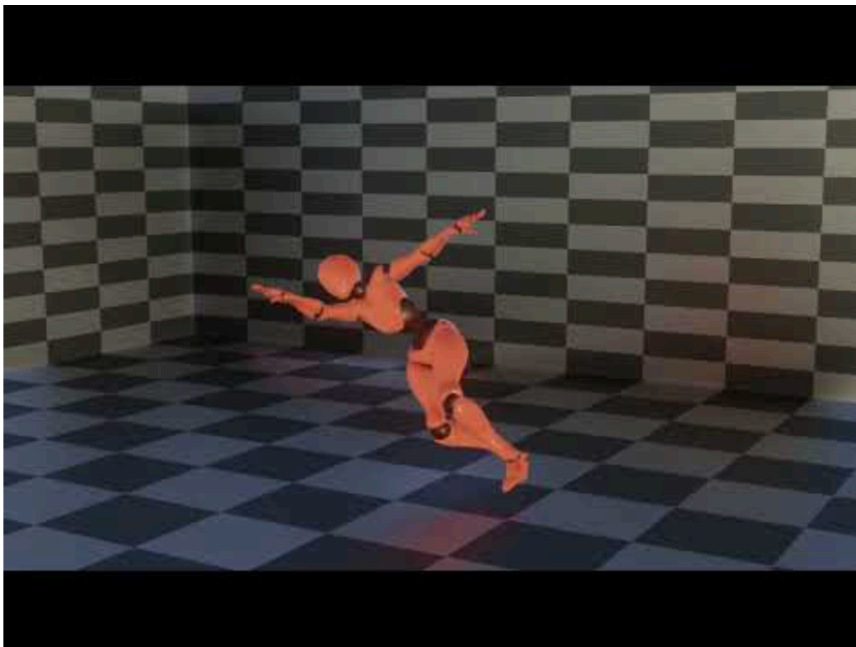

Q1 for result 1 : To what extent do you agree with the following statements? \*

--- The generated motion looks like ballet jazz dance.

|                   |                       |                       |                       |                       |                       |                |
|-------------------|-----------------------|-----------------------|-----------------------|-----------------------|-----------------------|----------------|
|                   | 1                     | 2                     | 3                     | 4                     | 5                     |                |
| Strongly disagree | <input type="radio"/> | Strongly agree |

Q2 for result 1 : To what extent do you agree with the following statements? \*

--- The generated motion looks natural.

|                   |                       |                       |                       |                       |                       |                |
|-------------------|-----------------------|-----------------------|-----------------------|-----------------------|-----------------------|----------------|
|                   | 1                     | 2                     | 3                     | 4                     | 5                     |                |
| Strongly disagree | <input type="radio"/> | Strongly agree |

Q3 for result 1 : Which feature(s) do you think is (are) the most preserved between the original and the result video? \*

- Orientation through space
- Shapes of the limbs
- Shape of the body trunk
- Rhythmic patterns
- Other...

Comment (optional)

Short answer text

---



original movement sequence

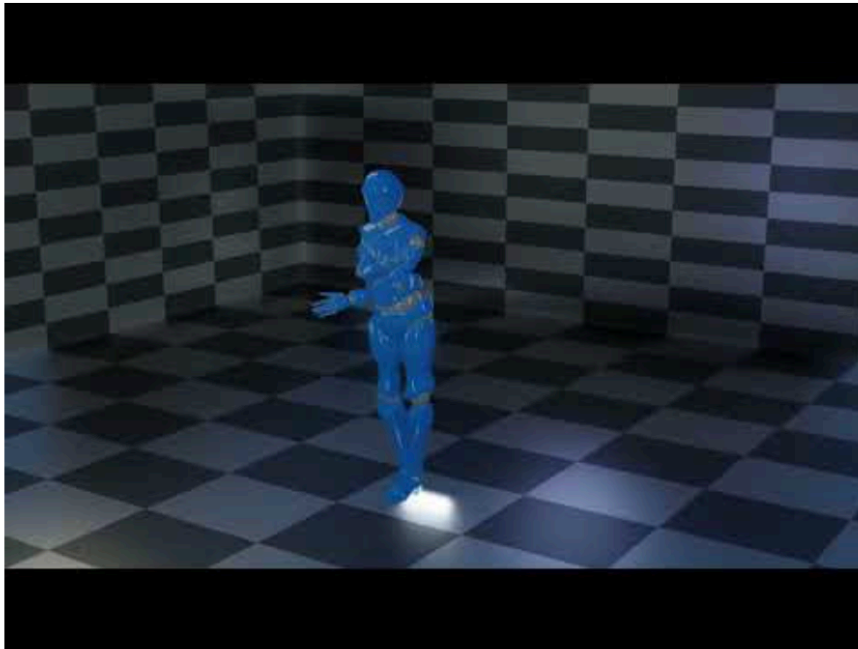

result 2

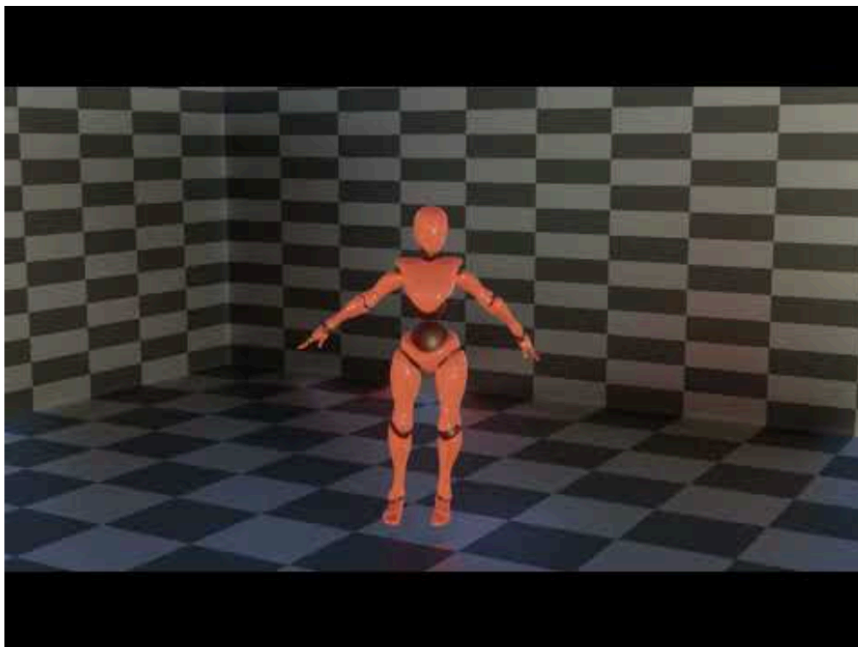

Q1 for result 2 : To what extent do you agree with the following statements? \*

--- The generated motion looks like ballet jazz dance.

|                   |                       |                       |                       |                       |                       |                |
|-------------------|-----------------------|-----------------------|-----------------------|-----------------------|-----------------------|----------------|
|                   | 1                     | 2                     | 3                     | 4                     | 5                     |                |
| Strongly disagree | <input type="radio"/> | Strongly agree |

Q2 for result 2 : To what extent do you agree with the following statements? \*

--- The generated motion looks natural.

|                   |                       |                       |                       |                       |                       |                |
|-------------------|-----------------------|-----------------------|-----------------------|-----------------------|-----------------------|----------------|
|                   | 1                     | 2                     | 3                     | 4                     | 5                     |                |
| Strongly disagree | <input type="radio"/> | Strongly agree |

Q3 for result 2 : Which feature(s) do you think is (are) the most preserved between the original and the result video? \*

- Orientation through space
- Shapes of the limbs
- Shape of the body trunk
- Rhythmic patterns
- Other...

Comment (optional)

Short answer text

---

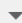

Section 11 of 12

## Thank You

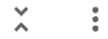

Thank you for your participation!

After section 11 Submit form

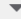

Section 12 of 12

## Thank You

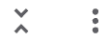

Thank you for your answers! This survey requires at least 5 years of dance experience.
